# Supplementary material for: Immunization of Nile tilapia (Oreochromis niloticus) Broodstock With Tilapia Lake Virus (TiLV) Inactivated Vaccines Elicits Protective Antibody and Passive Maternal Antibody Transfer
Source: Preprints.org preprint supplement (doi:10.20944/preprints202201.0015.v1), 2022-01-04
Supplement: Supplementary file 1 [file Supplement data TiLV vaccine in broodstock.docx]

**Supplement data**

| 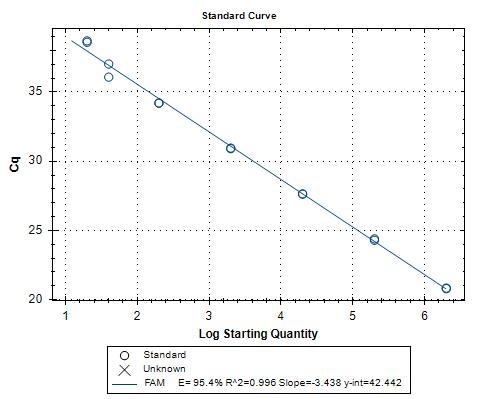  Y=-3.438x+42.442 |
| --- |
| **Figure S1**. Standard curve for viral load calculation |

| 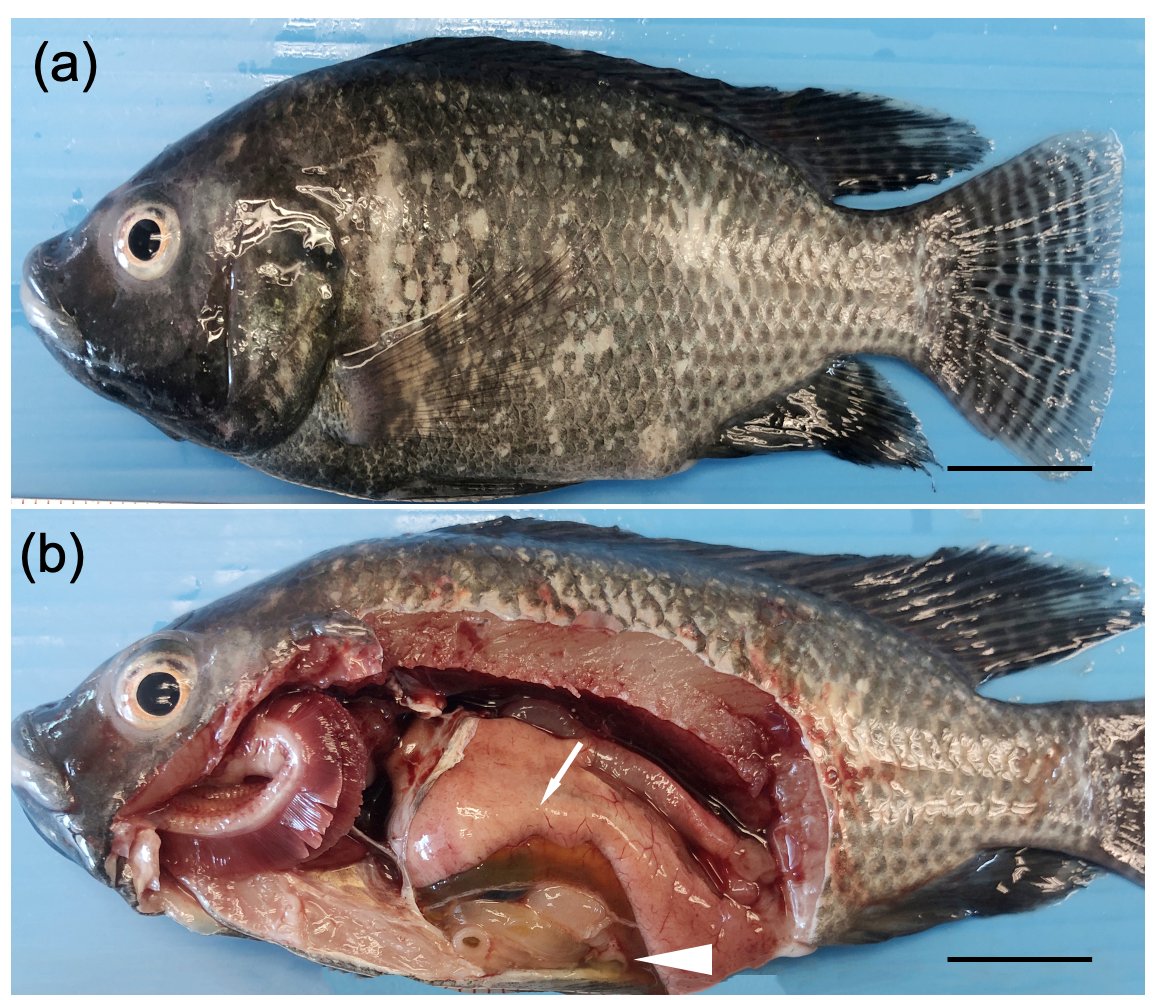 |
| --- |
| **Figure S2.** (a) Gross lesions of infected fish showed scale erosion, skin lesions, discoloration. (b) Internal postmortem changes including gill pallor, liver pallor (arrow) and ascitic fluid (head arrow). Sample was taken on 6 dpc from group 3. Scale bar = 1 cm. |

**Table S1.** TiLVcopy number measured by RT-qPCR targeting RNA segment 9

| **Fish No** | **Group** | **Time of death** | **Cq for TiLV segment 9** | **Cq for *EF1α*** | **Viral copy number/ µg RNA template** |
| --- | --- | --- | --- | --- | --- |
| 1 | 3 | Day 2 | 31.54 | 19.95 | 7.4 × 103 |
| 2 | 3 | Day 6 | 22.7 | 19.52 | 1.4 × 106 |
| 3 | 3 | Day 8 | 37.27 | 20.16 | 1.6 × 102 |
| 4 | 3 | Day 9 | ND | 19.52 | 0 |
| 5 | 3 | Day 11 | 38.37 | 19.62 | 7.5 × 10 |
| 6 | 3 | Day 12 | 36.15 | 20.76 | 3.4 × 102 |
| 7 | 3 | Day 16 | 36.99 | 21.15 | 1.8 × 102 |
| 8 | 3 | Day 16 | 34.22 | 21.95 | 1.2 × 103 |
| 9 | 3 | Day 16 | ND | 19.43 | 0 |
| 10 | 3 | Day 16 | 36.74 | 21.01 | 2.3 × 102 |
| 11 | 3 | Day 17 | 39.93 | 19.41 | 2.5 × 10 |
| 12 | 1 | Day 10 | ND | 19.81 | 0 |
| 13 | 2 | Day 10 | ND | 20.11 | 0 |
| 14 | 1 | Day 21 | ND | 21.01 | 0 |
| 15 | 1 | Day 21 | ND | 20.91 | 0 |
| 16 | 1 | Day 21 | ND | 21.04 | 0 |
| 17 | 1 | Day 21 | ND | 21.21 | 0 |
| 18 | 1 | Day 21 | ND | 20.90 | 0 |
| 19 | 2 | Day 21 | ND | 21.79 | 0 |
| 20 | 2 | Day 21 | ND | 22.40 | 0 |
| 21 | 2 | Day 21 | ND | 20.24 | 0 |
| 22 | 2 | Day 21 | ND | 21.58 | 0 |
| 23 | 2 | Day 21 | ND | 21.25 | 0 |
| 24 | 3 | Day 21 | ND | 22.44 | 0 |
| 25 | 3 | Day 21 | ND | 20.37 | 0 |
| 26 | 3 | Day 21 | ND | 19.06 | 0 |
| 27 | 3 | Day 21 | ND | 19.59 | 0 |
| 28 | 3 | Day 21 | ND | 22.31 | 0 |

ND: not detectable; Cq: quantification cycle; *EF1α*: *elongation factor-1α* gene
